# Supplementary material for: Cervical Fluids Are a Source of Protein Biomarkers for Early, Non-Invasive Endometrial Cancer Diagnosis
Source: MDPI journal article supplement (doi:10.3390/cancers15030911), 2023-01-31
Supplement: s1 [file s1]

|        |           |                          | UTERINE FLUIDS |       |        | M1 CERVICAL SAMPLES |       |       | M3 CERVICAL SAMPLES |       |       |
|--------|-----------|--------------------------|----------------|-------|--------|---------------------|-------|-------|---------------------|-------|-------|
| Entry  | Gene Name | Peptide                  | Fold Change    | FDR   | AUC    | Fold Change         | FDR   | AUC   | Fold Change         | FDR   | AUC   |
| P00338 | LDHA      | LVIITAGAR                | 7.127          | 0.000 | 0.9575 | 1.486               | 0.114 | 0.758 | 1.572               | 0.034 | 0.748 |
| P06733 | ENO1      | YISPDQLADLYK             | 5.091          | 0.000 | 0.9477 | 1.209               | 0.210 | 0.690 | 1.690               | 0.016 | 0.814 |
| P00338 | LDHA      | VTLTSEEEAR               | 6.183          | 0.000 | 0.9444 | 1.471               | 0.114 | 0.758 | 1.502               | 0.041 | 0.735 |
| P06733 | ENO1      | TIAPALVSK                | 4.753          | 0.000 | 0.9379 | 1.322               | 0.154 | 0.716 | 1.561               | 0.018 | 0.791 |
| P14618 | PKM       | NTGIICIGPASR             | 5.405          | 0.000 | 0.9346 | 1.317               | 0.211 | 0.680 | 1.374               | 0.019 | 0.781 |
| P42574 | CASP3     | SGTDVDAAANLR             | 6.428          | 0.001 | 0.9020 | 1.410               | 0.251 | 0.663 | 1.250               | 0.059 | 0.712 |
| P16949 | STMN1     | SHEAEVLK                 | 4.651          | 0.001 | 0.8987 | 1.491               | 0.154 | 0.711 | 2.318               | 0.022 | 0.770 |
| O00299 | CLIC1     | LAALNPESNTAGLDIFAK       | 3.373          | 0.001 | 0.8922 | 1.125               | 0.300 | 0.627 | 1.694               | 0.018 | 0.801 |
| O00299 | CLIC1     | NSNPALNDNLEK             | 3.290          | 0.001 | 0.8922 | 1.244               | 0.251 | 0.663 | 1.422               | 0.021 | 0.771 |
| P55060 | CSE1L     | ANIVHMLMLSSPEIQK         | 5.637          | 0.001 | 0.8922 | 2.013               | 0.114 | 0.765 | 2.248               | 0.016 | 0.827 |
| P55060 | CSE1L     | LLQTDDEEEAGLLELLK        | 5.914          | 0.001 | 0.8905 | 2.165               | 0.095 | 0.788 | 2.527               | 0.016 | 0.819 |
| P14174 | MIF       | LLCGLLAER                | 3.669          | 0.001 | 0.8889 | 1.229               | 0.269 | 0.647 | 1.628               | 0.018 | 0.797 |
| P43490 | NAMPT     | YLLETSGNLDGLEYK          | 10.476         | 0.001 | 0.8889 | 1.664               | 0.154 | 0.711 | 1.183               | 0.259 | 0.627 |
| Q06830 | PRDX1     | LVQAFQFTDK               | 5.115          | 0.001 | 0.8889 | 1.344               | 0.248 | 0.667 | 1.565               | 0.016 | 0.807 |
| P16949 | STMN1     | AIEENNNFSK               | 4.630          | 0.001 | 0.8889 | 1.582               | 0.154 | 0.712 | 2.319               | 0.021 | 0.771 |
| Q01469 | FABP5     | LVVECVMNVTCTR            | 2.730          | 0.001 | 0.8856 | 0.376               | 0.738 | 0.546 | 1.104               | 0.723 | 0.539 |
| Q01469 | FABP5     | ELGVGIALR                | 2.544          | 0.001 | 0.8824 | 0.460               | 0.765 | 0.539 | 1.004               | 0.974 | 0.503 |
| O43278 | SPINT1    | SFVYGGCLGNK              | 4.416          | 0.001 | 0.8824 | 0.960               | 0.666 | 0.559 | 1.528               | 0.046 | 0.729 |
| P43490 | NAMPT     | YDGHLPPIEK               | 9.572          | 0.001 | 0.8725 | 1.739               | 0.114 | 0.748 | 1.074               | 0.324 | 0.608 |
| P12830 | CDH1      | VFYSITGQGADTPPVGVFIER    | 4.498          | 0.001 | 0.8660 | 0.775               | 0.619 | 0.572 | 1.832               | 0.018 | 0.791 |
| O43278 | SPINT1    | WYYDPTEQICK              | 4.056          | 0.001 | 0.8644 | 0.755               | 0.666 | 0.559 | 1.527               | 0.071 | 0.703 |
| P61604 | HSPE1     | FLPLFDR                  | 5.020          | 0.002 | 0.8529 | 1.986               | 0.134 | 0.725 | 1.987               | 0.019 | 0.781 |
| P35222 | CTNNB1    | LVQLLVR                  | 4.875          | 0.002 | 0.8480 | 2.034               | 0.114 | 0.748 | 2.129               | 0.016 | 0.819 |
| Q06830 | PRDX1     | ADEGISFR                 | 4.575          | 0.002 | 0.8448 | 1.449               | 0.210 | 0.693 | 1.586               | 0.016 | 0.817 |
| P12830 | CDH1      | NLVQIK                   | 3.738          | 0.002 | 0.8382 | 0.897               | 0.888 | 0.516 | 1.817               | 0.016 | 0.814 |
| P62937 | PPIA      | FEDENFILK                | 2.830          | 0.002 | 0.8366 | 1.142               | 0.308 | 0.624 | 1.582               | 0.019 | 0.784 |
| P60174 | TPI1      | VVLAYEPVWAI GTGK         | 3.320          | 0.003 | 0.8333 | 1.268               | 0.278 | 0.637 | 1.664               | 0.019 | 0.781 |
| P62937 | PPIA      | VSFELFADK                | 3.057          | 0.003 | 0.8301 | 1.178               | 0.290 | 0.634 | 1.835               | 0.016 | 0.833 |
| P61604 | HSPE1     | VLLPEYGGTK               | 5.448          | 0.003 | 0.8268 | 1.744               | 0.210 | 0.683 | 1.871               | 0.027 | 0.758 |
| P40121 | CAPG      | EGNPEEDLTADK             | 4.366          | 0.003 | 0.8268 | 1.358               | 0.308 | 0.624 | 1.389               | 0.065 | 0.708 |
| P14780 | MMP9      | SLGPALLLLQK              | 3.551          | 0.003 | 0.8235 | 0.670               | 0.475 | 0.595 | 0.439               | 0.270 | 0.624 |
| P07237 | P4HB      | ILEFFGLK                 | 3.264          | 0.004 | 0.8186 | 0.913               | 0.300 | 0.627 | 1.249               | 0.338 | 0.605 |
| P35222 | CTNNB1    | LLNDEDQVVVNK             | 4.478          | 0.004 | 0.8137 | 2.069               | 0.210 | 0.683 | 2.318               | 0.019 | 0.784 |
| P40121 | CAPG      | YQEGGVESAFHK             | 3.808          | 0.004 | 0.8121 | 1.403               | 0.270 | 0.644 | 1.404               | 0.027 | 0.758 |
| P10451 | SPP1      | ANDESNEHSDVIDSQELSK      | 8.453          | 0.004 | 0.8105 | 1.961               | 0.114 | 0.745 | 1.404               | 0.595 | 0.557 |
| P16070 | CD44      | TEAADLCK                 | 3.198          | 0.005 | 0.8072 | 1.712               | 0.131 | 0.729 | 1.623               | 0.034 | 0.745 |
| P05164 | MPO       | VVLEGGIDPILR             | 9.227          | 0.006 | 0.8007 | 1.363               | 0.702 | 0.552 | 1.078               | 0.347 | 0.601 |
| P07355 | ANXA2     | GVDEV TIVNLTNR           | 8.099          | 0.006 | 0.7974 | 0.682               | 0.656 | 0.562 | 1.347               | 0.034 | 0.745 |
| P14780 | MMP9      | AFALWSAVTPLTFTR          | 3.671          | 0.006 | 0.7974 | 0.647               | 0.501 | 0.588 | 0.583               | 0.417 | 0.588 |
| P05164 | MPO       | IANVFTNAFR               | 8.567          | 0.007 | 0.7941 | 1.498               | 0.656 | 0.562 | 0.953               | 0.590 | 0.559 |
| P04792 | HSPB1     | LATQSN EITIPVTFESR       | 5.090          | 0.007 | 0.7908 | 1.534               | 0.269 | 0.650 | 1.325               | 0.016 | 0.824 |
| P60174 | TPI1      | SNVSDAVAQSTR             | 3.397          | 0.007 | 0.7908 | 1.369               | 0.210 | 0.690 | 1.510               | 0.024 | 0.765 |
| P30041 | PRDX6     | DFTPVCTTELGR             | 2.831          | 0.009 | 0.7843 | 1.234               | 0.300 | 0.627 | 1.645               | 0.034 | 0.748 |
| P09211 | GSTP1     | ASCLYGQLPK               | 2.951          | 0.009 | 0.7843 | 1.274               | 0.269 | 0.650 | 1.293               | 0.059 | 0.712 |
| P04792 | HSPB1     | LFDQA FGLPR              | 5.632          | 0.010 | 0.7778 | 1.742               | 0.262 | 0.660 | 1.235               | 0.016 | 0.810 |
| P04083 | ANXA1     | GGPGSAVSPYPTFNPSSDVAALHK | 6.153          | 0.011 | 0.7745 | 0.622               | 0.484 | 0.592 | 1.265               | 0.432 | 0.585 |
