# Supplementary material for: Cervical Fluids Are a Source of Protein Biomarkers for Early, Non-Invasive Endometrial Cancer Diagnosis
Source: MDPI journal article supplement (doi:10.3390/cancers15030911), 2023-01-31
Supplement: s1 [file s1]

|        |           |                       |        |       |        |       |       |       |       |       |       |
|--------|-----------|-----------------------|--------|-------|--------|-------|-------|-------|-------|-------|-------|
| P04083 | ANXA1     | DITSDTSGDFR           | 6.761  | 0.011 | 0.7745 | 0.698 | 0.484 | 0.592 | 1.122 | 0.958 | 0.507 |
| P09211 | GSTP1     | TLGLYGK               | 2.910  | 0.011 | 0.7745 | 1.277 | 0.269 | 0.650 | 1.372 | 0.048 | 0.725 |
| P30041 | PRDX6     | LSILYPATTGR           | 3.283  | 0.014 | 0.7647 | 1.326 | 0.269 | 0.647 | 1.434 | 0.077 | 0.696 |
| P14174 | MIF       | VYINYYDMNAANVGWNNSTFA | 8.416  | 0.008 | 0.7598 | 1.339 | 0.210 | 0.681 | 1.524 | 0.053 | 0.719 |
| O43852 | CALU      | TFDQLTPEESK           | 4.042  | 0.016 | 0.7582 | 2.083 | 0.128 | 0.725 | 1.578 | 0.082 | 0.691 |
| P07237 | P4HB      | ALAPEYAK              | 2.741  | 0.016 | 0.7582 | 0.780 | 0.777 | 0.536 | 1.117 | 0.573 | 0.562 |
| Q13938 | CAPS      | SGDGVVTVDLRL          | 3.670  | 0.018 | 0.7549 | 2.351 | 0.210 | 0.681 | 1.409 | 0.437 | 0.583 |
| P22626 | HNRNPA2B1 | TLETVPLER             | 2.214  | 0.020 | 0.7500 | 1.412 | 0.269 | 0.657 | 1.536 | 0.059 | 0.712 |
| P10451 | SPP1      | AIPVAQDLNAPSDWDSR     | 3.958  | 0.021 | 0.7484 | 0.851 | 0.226 | 0.675 | 0.580 | 0.766 | 0.533 |
| Q13938 | CAPS      | EAVIAAAFAK            | 3.323  | 0.024 | 0.7418 | 2.136 | 0.248 | 0.667 | 1.631 | 0.299 | 0.614 |
| P50454 | SERPINH1  | GVVEVTHDLQK           | 2.413  | 0.026 | 0.7386 | 5.886 | 0.062 | 0.828 | 3.977 | 0.038 | 0.735 |
| Q01995 | TAGLN     | TLMALGSLAVTK          | 2.046  | 0.040 | 0.7222 | 3.938 | 0.269 | 0.652 | 6.348 | 0.016 | 0.840 |
| P30086 | PEBP1     | VLTPQVK               | 1.967  | 0.040 | 0.7222 | 0.766 | 0.844 | 0.523 | 1.392 | 0.071 | 0.703 |
| P80188 | LCN2      | VPLQQNFQDNQFQ GK      | 2.535  | 0.044 | 0.7157 | 0.661 | 0.270 | 0.644 | 0.648 | 0.190 | 0.647 |
| P30086 | PEBP1     | LYEQLSGK              | 1.997  | 0.045 | 0.7157 | 0.944 | 0.720 | 0.549 | 1.410 | 0.077 | 0.696 |
| P50454 | SERPINH1  | DTQSGSLLFGR           | 2.674  | 0.042 | 0.7157 | 5.425 | 0.210 | 0.662 | 4.222 | 0.046 | 0.717 |
| P05787 | KRT8      | LSELEAALQR            | 12.502 | 0.047 | 0.7124 | 5.547 | 0.114 | 0.761 | 2.612 | 0.036 | 0.742 |
| P17931 | LGALS3    | GNDVAFHFNPR           | 2.540  | 0.047 | 0.7124 | 1.239 | 0.300 | 0.627 | 1.322 | 0.018 | 0.797 |
| P22626 | HNRNPA2B1 | GGNFGFGDSR            | 2.706  | 0.047 | 0.7108 | 1.343 | 0.278 | 0.637 | 1.989 | 0.021 | 0.775 |
| P17931 | LGALS3    | IALDFQR               | 2.606  | 0.057 | 0.7026 | 1.274 | 0.278 | 0.641 | 1.283 | 0.018 | 0.794 |
| P09466 | PAEP      | VLVEDDEIMQGFIR        | 0.038  | 0.047 | 0.6993 | 0.007 | 0.248 | 0.660 | 0.003 | 0.054 | 0.712 |
| P07339 | CTSD      | VGFAEAAAR             | 1.575  | 0.069 | 0.6928 | 1.485 | 0.270 | 0.644 | 1.166 | 0.100 | 0.680 |
| P07339 | CTSD      | VSTLPAITLK            | 1.598  | 0.069 | 0.6928 | 1.217 | 0.637 | 0.569 | 1.104 | 0.233 | 0.634 |
| P80188 | LCN2      | ELTSELK               | 2.045  | 0.074 | 0.6895 | 0.631 | 0.278 | 0.637 | 0.671 | 0.233 | 0.634 |
| Q16658 | FSCN1     | YLAPSGPSGTLK          | 1.800  | 0.084 | 0.6830 | 1.463 | 0.300 | 0.631 | 2.187 | 0.034 | 0.745 |
| P07355 | ANXA2     | QDIAFAYQR             | 8.887  | 0.066 | 0.6797 | 0.719 | 0.827 | 0.526 | 1.114 | 0.097 | 0.681 |
| Q01995 | TAGLN     | EFTESQLQEGK           | 1.881  | 0.111 | 0.6699 | 5.254 | 0.269 | 0.641 | 5.804 | 0.021 | 0.773 |
| Q16658 | FSCN1     | FLIVAHDDGR            | 1.960  | 0.122 | 0.6634 | 1.865 | 0.154 | 0.709 | 2.124 | 0.048 | 0.724 |
| P05787 | KRT8      | WSLLQQQK              | 13.174 | 0.122 | 0.6634 | 6.437 | 0.114 | 0.742 | 2.400 | 0.048 | 0.725 |
| P08253 | MMP2      | VDAAFNWSK             | 0.727  | 0.121 | 0.6634 | 1.664 | 0.398 | 0.608 | 0.716 | 0.088 | 0.688 |
| P15941 | MUC1      | EGTINVHDTVETQFNQYK    | 1.751  | 0.131 | 0.6585 | 0.899 | 0.918 | 0.511 | 1.682 | 0.082 | 0.693 |
| P15941 | MUC1      | QGGFLGLSNIK           | 1.785  | 0.181 | 0.6405 | 1.015 | 0.656 | 0.565 | 1.413 | 0.190 | 0.647 |
| P09382 | LGALS1    | LPDGYEFK              | 1.368  | 0.181 | 0.6405 | 2.074 | 0.114 | 0.745 | 2.030 | 0.044 | 0.732 |
| P14618 | PKM       | APIIAVTR              | 1.926  | 0.181 | 0.6405 | 4.230 | 0.269 | 0.654 | 1.492 | 0.212 | 0.641 |
| P00441 | SOD1      | AVCVLK                | 1.631  | 0.181 | 0.6405 | 0.936 | 0.827 | 0.526 | 1.384 | 0.091 | 0.686 |
| P00441 | SOD1      | TLVVHEK               | 1.620  | 0.190 | 0.6373 | 0.888 | 0.702 | 0.552 | 1.382 | 0.114 | 0.673 |
| P09382 | LGALS1    | SFVLNLGK              | 1.249  | 0.365 | 0.5980 | 2.018 | 0.131 | 0.729 | 2.099 | 0.026 | 0.761 |
| P01833 | PIGR      | GGCITLISSEGYVSSK      | 1.127  | 0.468 | 0.5801 | 0.265 | 0.210 | 0.683 | 0.661 | 0.290 | 0.618 |
| Q14508 | WFDC2     | VSCVTPNF              | 0.900  | 0.611 | 0.5588 | 0.514 | 0.656 | 0.562 | 0.519 | 0.096 | 0.683 |
| P15328 | FOLR1     | FNWNHCGEMAPACK        | 0.362  | 0.628 | 0.5556 | 0.557 | 0.765 | 0.539 | 0.530 | 0.282 | 0.621 |
| P09603 | CSF1      | TFYETPLQLLEK          | 0.917  | 0.678 | 0.5458 | 1.302 | 0.777 | 0.533 | 1.330 | 0.290 | 0.614 |
| P01833 | PIGR      | VYTVDLGR              | 1.152  | 0.739 | 0.5392 | 0.547 | 0.475 | 0.595 | 0.673 | 0.311 | 0.611 |
| P08670 | VIM       | ILLAELEQLK            | 0.994  | 0.757 | 0.5359 | 1.189 | 0.269 | 0.647 | 1.485 | 0.075 | 0.699 |
| P15328 | FOLR1     | TELLNVCMNAK           | 0.399  | 0.759 | 0.5343 | 0.591 | 0.974 | 0.503 | 0.605 | 0.347 | 0.601 |
| P16035 | TIMP2     | EVDSGNDIYGNIPIK       | 0.876  | 0.805 | 0.5278 | 0.563 | 0.278 | 0.637 | 0.660 | 0.077 | 0.696 |
| P08670 | VIM       | ISLPLPNFSSNLRL        | 0.965  | 0.861 | 0.5196 | 2.646 | 0.095 | 0.804 | 2.722 | 0.019 | 0.784 |
| Q75556 | SCGB2A1   | TINSDISIPEYK          | 2.476  | 0.930 | 0.5098 | 0.188 | 0.827 | 0.526 | 0.134 | 0.835 | 0.523 |
| Q14508 | WFDC2     | EGSCPQVNINFPQLGLCR    | 1.118  | 0.961 | 0.5049 | 0.517 | 0.765 | 0.539 | 0.529 | 0.299 | 0.614 |
