# Supplementary material for: Cervical Fluids Are a Source of Protein Biomarkers for Early, Non-Invasive Endometrial Cancer Diagnosis
Source: MDPI journal article supplement (doi:10.3390/cancers15030911), 2023-01-31
Supplement: s1 [file s1]

|                       |                          |            |   |
|-----------------------|--------------------------|------------|---|
| sp P16070 CD44_HUMAN  | TEAADLCK                 | 458.220217 | 2 |
| sp P15328 FOLR1_HUMAN | TELLNVCMNAK              | 646.820498 | 2 |
| sp P15328 FOLR1_HUMAN | TELLNVCMNAK              | 650.827597 | 2 |
| sp P15328 FOLR1_HUMAN | FNWNHCGEMAPACK           | 574.570893 | 3 |
| sp P15328 FOLR1_HUMAN | FNWNHCGEMAPACK           | 577.242293 | 3 |
| sp O43852 CALU_HUMAN  | TFDQLTPESK               | 647.811707 | 2 |
| sp O43852 CALU_HUMAN  | TFDQLTPESK               | 651.818806 | 2 |
| sp P09603 CSF1_HUMAN  | AFLLVQDIMEDTMR           | 841.418033 | 2 |
| sp P09603 CSF1_HUMAN  | AFLLVQDIMEDTMR           | 846.422168 | 2 |
| sp P09603 CSF1_HUMAN  | TFYETPLQLEK              | 741.39795  | 2 |
| sp P09603 CSF1_HUMAN  | TFYETPLQLEK              | 745.405049 | 2 |
| sp Q06830 PRDX1_HUMAN | ADEGISFR                 | 447.719424 | 2 |
| sp Q06830 PRDX1_HUMAN | ADEGISFR                 | 452.723558 | 2 |
| sp Q06830 PRDX1_HUMAN | LVQAFQFTDK               | 598.819138 | 2 |
| sp Q06830 PRDX1_HUMAN | LVQAFQFTDK               | 602.826238 | 2 |
| sp O75556 SG2A1_HUMAN | TINSDISIPEYK             | 690.356282 | 2 |
| sp O75556 SG2A1_HUMAN | TINSDISIPEYK             | 694.363381 | 2 |
| sp O75556 SG2A1_HUMAN | ELLQEFIDSDAAAEAMGK       | 646.643546 | 3 |
| sp O75556 SG2A1_HUMAN | ELLQEFIDSDAAAEAMGK       | 649.314945 | 3 |
| sp P22626 ROA2_HUMAN  | TLETVPLER                | 529.298038 | 2 |
| sp P22626 ROA2_HUMAN  | TLETVPLER                | 534.302173 | 2 |
| sp P22626 ROA2_HUMAN  | GGNFGFGDSR               | 507.225405 | 2 |
| sp P22626 ROA2_HUMAN  | GGNFGFGDSR               | 512.229539 | 2 |
| sp P09211 GSTP1_HUMAN | ASCLYGQLPK               | 568.792066 | 2 |
| sp P09211 GSTP1_HUMAN | ASCLYGQLPK               | 572.799166 | 2 |
| sp P09211 GSTP1_HUMAN | TLGLYGK                  | 376.221071 | 2 |
| sp P09211 GSTP1_HUMAN | TLGLYGK                  | 380.228171 | 2 |
| sp Q01995 TAGL_HUMAN  | TLMALGSLAVTK             | 602.852124 | 2 |
| sp Q01995 TAGL_HUMAN  | TLMALGSLAVTK             | 606.859223 | 2 |
| sp Q01995 TAGL_HUMAN  | EFTESQLQEGK              | 648.309331 | 2 |
| sp Q01995 TAGL_HUMAN  | EFTESQLQEGK              | 652.316431 | 2 |
| sp P00441 SODC_HUMAN  | AVCVLK                   | 345.204367 | 2 |
| sp P00441 SODC_HUMAN  | AVCVLK                   | 349.211466 | 2 |
| sp P00441 SODC_HUMAN  | TLVVHEK                  | 413.245078 | 2 |
| sp P00441 SODC_HUMAN  | TLVVHEK                  | 417.252177 | 2 |
| sp P04083 ANXA1_HUMAN | GGPGSAVSPYPTFNPSSDVAALHK | 786.057118 | 3 |
| sp P04083 ANXA1_HUMAN | GGPGSAVSPYPTFNPSSDVAALHK | 788.728517 | 3 |
| sp P04083 ANXA1_HUMAN | DITSDTSGDFR              | 607.270206 | 2 |
| sp P04083 ANXA1_HUMAN | DITSDTSGDFR              | 612.274341 | 2 |
| sp Q01469 FABP5_HUMAN | ELGVGIALR                | 464.284734 | 2 |
| sp Q01469 FABP5_HUMAN | ELGVGIALR                | 469.288869 | 2 |
| sp Q01469 FABP5_HUMAN | LVVECMNNVTCTR            | 847.904767 | 2 |
| sp Q01469 FABP5_HUMAN | LVVECMNNVTCTR            | 852.908902 | 2 |
| sp P08253 MMP2_HUMAN  | IDAVYEAPQEEK             | 696.338089 | 2 |
| sp P08253 MMP2_HUMAN  | IDAVYEAPQEEK             | 700.345188 | 2 |
| sp P08253 MMP2_HUMAN  | VDAAFNWSK                | 519.256174 | 2 |
| sp P08253 MMP2_HUMAN  | VDAAFNWSK                | 523.263273 | 2 |
| sp P07237 PDIA1_HUMAN | ALAPEYAK                 | 431.737085 | 2 |
| sp P07237 PDIA1_HUMAN | ALAPEYAK                 | 435.744185 | 2 |
| sp P07237 PDIA1_HUMAN | ILEFFGLK                 | 483.786578 | 2 |
| sp P07237 PDIA1_HUMAN | ILEFFGLK                 | 487.793678 | 2 |
| sp P12830 CADH1_HUMAN | NLVQIK                   | 357.729063 | 2 |
| sp P12830 CADH1_HUMAN | NLVQIK                   | 361.736163 | 2 |
| sp P12830 CADH1_HUMAN | VFYSITGQGADTPPVGVFIIR    | 789.417875 | 3 |
| sp P12830 CADH1_HUMAN | VFYSITGQGADTPPVGVFIIR    | 792.753965 | 3 |
| sp P61604 CH10_HUMAN  | FLPLFDR                  | 454.255445 | 2 |
| sp P61604 CH10_HUMAN  | FLPLFDR                  | 459.25958  | 2 |
| sp P61604 CH10_HUMAN  | VLLPEYGGTK               | 538.802957 | 2 |
| sp P61604 CH10_HUMAN  | VLLPEYGGTK               | 542.810056 | 2 |
| sp P30086 PEBP1_HUMAN | VLTPQVK                  | 443.273835 | 2 |
| sp P30086 PEBP1_HUMAN | VLTPQVK                  | 447.280935 | 2 |
| sp P30086 PEBP1_HUMAN | LYEQLSGK                 | 469.2531   | 2 |
| sp P30086 PEBP1_HUMAN | LYEQLSGK                 | 473.260199 | 2 |
| sp P09466 PAEP_HUMAN  | VLVEDDEIMQGFIR           | 832.42163  | 2 |
| sp P09466 PAEP_HUMAN  | VLVEDDEIMQGFIR           | 837.425764 | 2 |
| sp P80188 NGAL_HUMAN  | VPLQQNFQDNQFQGGK         | 597.632192 | 3 |
