# Supplementary material for: Cervical Fluids Are a Source of Protein Biomarkers for Early, Non-Invasive Endometrial Cancer Diagnosis
Source: MDPI journal article supplement (doi:10.3390/cancers15030911), 2023-01-31
Supplement: s1 [file s1]

|                       |                       |            |   |
|-----------------------|-----------------------|------------|---|
| sp P80188 NGAL_HUMAN  | VPLQQNFQDNQFQ GK      | 600.303591 | 3 |
| sp P80188 NGAL_HUMAN  | ELTSELK               | 410.22655  | 2 |
| sp P80188 NGAL_HUMAN  | ELTSELK               | 414.23365  | 2 |
| sp Q14508 WFDC2_HUMAN | EGSCPQVNINFPQLGLCR    | 697.003303 | 3 |
| sp Q14508 WFDC2_HUMAN | EGSCPQVNINFPQLGLCR    | 700.339392 | 3 |
| sp Q14508 WFDC2_HUMAN | VSCVTPNF              | 462.218203 | 2 |
| sp Q14508 WFDC2_HUMAN | VSCVTPNF              | 467.231817 | 2 |
| sp P62937 PIIA_HUMAN  | VSFELFADK             | 528.274032 | 2 |
| sp P62937 PIIA_HUMAN  | VSFELFADK             | 532.281132 | 2 |
| sp P62937 PIIA_HUMAN  | FEDENFILK             | 577.790046 | 2 |
| sp P62937 PIIA_HUMAN  | FEDENFILK             | 581.797146 | 2 |
| sp P04792 HSPB1_HUMAN | LFDQAFGLPR            | 582.314023 | 2 |
| sp P04792 HSPB1_HUMAN | LFDQAFGLPR            | 587.318157 | 2 |
| sp P04792 HSPB1_HUMAN | LATQSN EITIPVTFESR    | 953.499455 | 2 |
| sp P04792 HSPB1_HUMAN | LATQSN EITIPVTFESR    | 958.503589 | 2 |
| sp P07339 CATD_HUMAN  | VSTLPAILTK            | 521.828974 | 2 |
| sp P07339 CATD_HUMAN  | VSTLPAILTK            | 525.836074 | 2 |
| sp P07339 CATD_HUMAN  | VGFAEAAR              | 410.719227 | 2 |
| sp P07339 CATD_HUMAN  | VGFAEAAR              | 415.723361 | 2 |
| sp P11166 GTR1_HUMAN  | TFDEIASGFR            | 571.77747  | 2 |
| sp P11166 GTR1_HUMAN  | TFDEIASGFR            | 576.781605 | 2 |
| sp P00338 LDHA_HUMAN  | LVITAGAR              | 457.295102 | 2 |
| sp P00338 LDHA_HUMAN  | LVITAGAR              | 462.299236 | 2 |
| sp P00338 LDHA_HUMAN  | VTLTSEEEAR            | 567.785492 | 2 |
| sp P00338 LDHA_HUMAN  | VTLTSEEEAR            | 572.789627 | 2 |
| sp P60174 TPIS_HUMAN  | VVLAYEPVWAIGTGK       | 801.948141 | 2 |
| sp P60174 TPIS_HUMAN  | VVLAYEPVWAIGTGK       | 805.95524  | 2 |
| sp P60174 TPIS_HUMAN  | SNVSDAVAQSTR          | 617.804748 | 2 |
| sp P60174 TPIS_HUMAN  | SNVSDAVAQSTR          | 622.808882 | 2 |
| sp P05164 PERM_HUMAN  | IANVFTNAFR            | 576.811647 | 2 |
| sp P05164 PERM_HUMAN  | IANVFTNAFR            | 581.815782 | 2 |
| sp P05164 PERM_HUMAN  | VVLEGGIDPILR          | 640.88227  | 2 |
| sp P05164 PERM_HUMAN  | VVLEGGIDPILR          | 645.886404 | 2 |
| sp P14174 MIF_HUMAN   | LLCGLLAER             | 522.797151 | 2 |
| sp P14174 MIF_HUMAN   | LLCGLLAER             | 527.801286 | 2 |
| sp P14174 MIF_HUMAN   | VYINYDDMNAANVGWNNSTFA | 809.695191 | 3 |
| sp P14174 MIF_HUMAN   | VYINYDDMNAANVGWNNSTFA | 813.037601 | 3 |
| sp P01833 PIGR_HUMAN  | GGCITLISSEGYVSSK      | 829.40872  | 2 |
| sp P01833 PIGR_HUMAN  | GGCITLISSEGYVSSK      | 833.415819 | 2 |
| sp P01833 PIGR_HUMAN  | VYTVDLGR              | 461.753267 | 2 |
| sp P01833 PIGR_HUMAN  | VYTVDLGR              | 466.757401 | 2 |
| sp P05787 K2C8_HUMAN  | WSLLQQQK              | 515.787641 | 2 |
| sp P05787 K2C8_HUMAN  | WSLLQQQK              | 519.79474  | 2 |
| sp P05787 K2C8_HUMAN  | LSELEAALQR            | 565.31422  | 2 |
| sp P05787 K2C8_HUMAN  | LSELEAALQR            | 570.318354 | 2 |
| sp O43278 SPIT1_HUMAN | WYYDPTEQICK           | 751.834659 | 2 |
| sp O43278 SPIT1_HUMAN | WYYDPTEQICK           | 755.841759 | 2 |
| sp O43278 SPIT1_HUMAN | SFVYGGCLGNK           | 601.287148 | 2 |
| sp O43278 SPIT1_HUMAN | SFVYGGCLGNK           | 605.294247 | 2 |
| sp P06733 ENOA_HUMAN  | TIAPALVSK             | 450.28166  | 2 |
| sp P06733 ENOA_HUMAN  | TIAPALVSK             | 454.28876  | 2 |
| sp P06733 ENOA_HUMAN  | YISPDQLADLYK          | 713.366649 | 2 |
| sp P06733 ENOA_HUMAN  | YISPDQLADLYK          | 717.373749 | 2 |
| sp Q16658 FSCN1_HUMAN | FLIVAHDDGR            | 381.536612 | 3 |
| sp Q16658 FSCN1_HUMAN | FLIVAHDDGR            | 384.872701 | 3 |
| sp Q16658 FSCN1_HUMAN | YLAPSGPSGTLK          | 595.82442  | 2 |
| sp Q16658 FSCN1_HUMAN | YLAPSGPSGTLK          | 599.83152  | 2 |
| sp P43490 NAMPT_HUMAN | YDGHLP I EIK          | 395.548517 | 3 |
| sp P43490 NAMPT_HUMAN | YDGHLP I EIK          | 398.219917 | 3 |
| sp P43490 NAMPT_HUMAN | YLLETSGNLDGLE YK      | 857.930342 | 2 |
| sp P43490 NAMPT_HUMAN | YLLETSGNLDGLE YK      | 861.937442 | 2 |
| sp P40121 CAPG_HUMAN  | YQEGGVESAFHK          | 451.214086 | 3 |
| sp P40121 CAPG_HUMAN  | YQEGGVESAFHK          | 453.885486 | 3 |
| sp P40121 CAPG_HUMAN  | EGNPEEDLTADK          | 659.293878 | 2 |
| sp P40121 CAPG_HUMAN  | EGNPEEDLTADK          | 663.300978 | 2 |
