# Supplementary material for: Cervical Fluids Are a Source of Protein Biomarkers for Early, Non-Invasive Endometrial Cancer Diagnosis
Source: MDPI journal article supplement (doi:10.3390/cancers15030911), 2023-01-31
Supplement: s1 [file s1]

| Protein Name          | Peptide Sequence    | Precursor Mz | Precursor Charge |
|-----------------------|---------------------|--------------|------------------|
| sp P17931 LEG3_HUMAN  | IALDFQR             | 431.742702   | 2                |
| sp P17931 LEG3_HUMAN  | IALDFQR             | 436.746837   | 2                |
| sp P17931 LEG3_HUMAN  | GNDVAFHFNPR         | 425.207266   | 3                |
| sp P17931 LEG3_HUMAN  | GNDVAFHFNPR         | 428.543355   | 3                |
| sp P10451 OSTP_HUMAN  | AIPVAQDLNAPSDWDSR   | 927.952671   | 2                |
| sp P10451 OSTP_HUMAN  | AIPVAQDLNAPSDWDSR   | 932.956806   | 2                |
| sp P10451 OSTP_HUMAN  | ANDESNEHSDVIDSQELSK | 706.313693   | 3                |
| sp P10451 OSTP_HUMAN  | ANDESNEHSDVIDSQELSK | 708.985092   | 3                |
| sp P35222 CTNB1_HUMAN | LLNDEDQVVVNK        | 693.367181   | 2                |
| sp P35222 CTNB1_HUMAN | LLNDEDQVVVNK        | 697.37428    | 2                |
| sp P35222 CTNB1_HUMAN | LVQLLVR             | 420.786913   | 2                |
| sp P35222 CTNB1_HUMAN | LVQLLVR             | 425.791047   | 2                |
| sp P30041 PRDX6_HUMAN | DFTPVCCTELGR        | 698.332284   | 2                |
| sp P30041 PRDX6_HUMAN | DFTPVCCTELGR        | 703.336418   | 2                |
| sp P30041 PRDX6_HUMAN | LSILYPATTGR         | 596.340238   | 2                |
| sp P30041 PRDX6_HUMAN | LSILYPATTGR         | 601.344372   | 2                |
| sp O00299 CLIC1_HUMAN | LAALNPESNTAGLDIFAK  | 922.991265   | 2                |
| sp O00299 CLIC1_HUMAN | LAALNPESNTAGLDIFAK  | 926.998365   | 2                |
| sp O00299 CLIC1_HUMAN | NSNPALNDNLEK        | 664.82568    | 2                |
| sp O00299 CLIC1_HUMAN | NSNPALNDNLEK        | 668.832779   | 2                |
| sp P14618 KPYM_HUMAN  | NTGIICTIGPASR       | 680.356093   | 2                |
| sp P14618 KPYM_HUMAN  | NTGIICTIGPASR       | 685.360228   | 2                |
| sp P14618 KPYM_HUMAN  | APIIAVTR            | 420.76872    | 2                |
| sp P14618 KPYM_HUMAN  | APIIAVTR            | 425.772854   | 2                |
| sp P07355 ANXA2_HUMAN | GVDEVTIVNILTNR      | 771.927937   | 2                |
| sp P07355 ANXA2_HUMAN | GVDEVTIVNILTNR      | 776.932071   | 2                |
| sp P07355 ANXA2_HUMAN | QDIAFAYQR           | 556.28018    | 2                |
| sp P07355 ANXA2_HUMAN | QDIAFAYQR           | 561.284315   | 2                |
| sp P15941 MUC1_HUMAN  | QGGFLGLSNIK         | 567.319305   | 2                |
| sp P15941 MUC1_HUMAN  | QGGFLGLSNIK         | 571.326405   | 2                |
| sp P15941 MUC1_HUMAN  | EGTINVHDTVETQFNQYK  | 674.656954   | 3                |
| sp P15941 MUC1_HUMAN  | EGTINVHDTVETQFNQYK  | 677.328354   | 3                |
| sp P55060 XPO2_HUMAN  | ANIVHMLMLSSPEQIQK   | 603.329344   | 3                |
| sp P55060 XPO2_HUMAN  | ANIVHMLMLSSPEQIQK   | 606.000744   | 3                |
| sp P55060 XPO2_HUMAN  | LLQTDDEEEAGLLELLK   | 965.006778   | 2                |
| sp P55060 XPO2_HUMAN  | LLQTDDEEEAGLLELLK   | 969.013878   | 2                |
| sp P50454 SERPH_HUMAN | GVVEVTHDLQK         | 408.890943   | 3                |
| sp P50454 SERPH_HUMAN | GVVEVTHDLQK         | 411.562343   | 3                |
| sp P50454 SERPH_HUMAN | DTQSGSLLFIGR        | 647.343509   | 2                |
| sp P50454 SERPH_HUMAN | DTQSGSLLFIGR        | 652.347643   | 2                |
| sp P16035 TIMP2_HUMAN | EVDSGNDIYGNPIK      | 760.865002   | 2                |
| sp P16035 TIMP2_HUMAN | EVDSGNDIYGNPIK      | 764.872102   | 2                |
| sp P09382 LEG1_HUMAN  | SFVLNLGK            | 439.260728   | 2                |
| sp P09382 LEG1_HUMAN  | SFVLNLGK            | 443.267827   | 2                |
| sp P09382 LEG1_HUMAN  | LPDGYEFK            | 484.739825   | 2                |
| sp P09382 LEG1_HUMAN  | LPDGYEFK            | 488.746925   | 2                |
| sp Q13938 CAYP1_HUMAN | EAVIAAAFAK          | 495.784567   | 2                |
| sp Q13938 CAYP1_HUMAN | EAVIAAAFAK          | 499.791666   | 2                |
| sp Q13938 CAYP1_HUMAN | SGDGVTVDDLR         | 616.809499   | 2                |
| sp Q13938 CAYP1_HUMAN | SGDGVTVDDLR         | 621.813633   | 2                |
| sp P42574 CASP3_HUMAN | SGTDVDAANLR         | 559.775459   | 2                |
| sp P42574 CASP3_HUMAN | SGTDVDAANLR         | 564.779593   | 2                |
| sp P16949 STMN1_HUMAN | SHEAEVLK            | 456.742899   | 2                |
| sp P16949 STMN1_HUMAN | SHEAEVLK            | 460.749999   | 2                |
| sp P16949 STMN1_HUMAN | AIEENNNFSK          | 583.277834   | 2                |
| sp P16949 STMN1_HUMAN | AIEENNNFSK          | 587.284934   | 2                |
| sp P14780 MMP9_HUMAN  | SLGPALLLLQK         | 576.871174   | 2                |
| sp P14780 MMP9_HUMAN  | SLGPALLLLQK         | 580.878273   | 2                |
| sp P14780 MMP9_HUMAN  | AFALWSAVTPLTFTFR    | 840.95904    | 2                |
| sp P14780 MMP9_HUMAN  | AFALWSAVTPLTFTFR    | 845.963174   | 2                |
| sp P08670 VIME_HUMAN  | ILLAELEQLK          | 585.360639   | 2                |
| sp P08670 VIME_HUMAN  | ILLAELEQLK          | 589.367738   | 2                |
| sp P08670 VIME_HUMAN  | ISLPLPNFSSLNLR      | 785.951215   | 2                |
| sp P08670 VIME_HUMAN  | ISLPLPNFSSLNLR      | 790.955349   | 2                |
| sp P16070 CD44_HUMAN  | TEAADLCK            | 454.213117   | 2                |
