# Supplementary material for: Cervical Fluids Are a Source of Protein Biomarkers for Early, Non-Invasive Endometrial Cancer Diagnosis
Source: MDPI journal article supplement (doi:10.3390/cancers15030911), 2023-01-31
Supplement: s1 [file s1]

| Protein Name          | Peptide Sequence    | Precursor Mz | Precursor Charge |
|-----------------------|---------------------|--------------|------------------|
| sp P17931 LEG3_HUMAN  | IALDFQR             | 431.742702   | 2                |
| sp P17931 LEG3_HUMAN  | IALDFQR             | 436.746837   | 2                |
| sp P17931 LEG3_HUMAN  | GNDVAFHFNPR         | 425.207266   | 3                |
| sp P17931 LEG3_HUMAN  | GNDVAFHFNPR         | 428.543355   | 3                |
| sp P10451 OSTP_HUMAN  | AIPVAQDLNAPSDWDSR   | 927.952671   | 2                |
| sp P10451 OSTP_HUMAN  | AIPVAQDLNAPSDWDSR   | 932.956806   | 2                |
| sp P10451 OSTP_HUMAN  | ANDESNEHSDVIDSQELSK | 706.313693   | 3                |
| sp P10451 OSTP_HUMAN  | ANDESNEHSDVIDSQELSK | 708.985092   | 3                |
| sp P35222 CTNB1_HUMAN | LLNDEDQVVVNK        | 693.367181   | 2                |
| sp P35222 CTNB1_HUMAN | LLNDEDQVVVNK        | 697.37428    | 2                |
| sp P35222 CTNB1_HUMAN | LVQLLVR             | 420.786913   | 2                |
| sp P35222 CTNB1_HUMAN | LVQLLVR             | 425.791047   | 2                |
| sp P30041 PRDX6_HUMAN | DFTPVCCTELGR        | 698.332284   | 2                |
| sp P30041 PRDX6_HUMAN | DFTPVCCTELGR        | 703.336418   | 2                |
| sp P30041 PRDX6_HUMAN | LSILYPATTGR         | 596.340238   | 2                |
| sp P30041 PRDX6_HUMAN | LSILYPATTGR         | 601.344372   | 2                |
| sp O00299 CLIC1_HUMAN | LAALNPESNTAGLDIFAK  | 922.991265   | 2                |
| sp O00299 CLIC1_HUMAN | LAALNPESNTAGLDIFAK  | 926.998365   | 2                |
| sp O00299 CLIC1_HUMAN | NSNPALNDNLEK        | 664.82568    | 2                |
| sp O00299 CLIC1_HUMAN | NSNPALNDNLEK        | 668.832779   | 2                |
| sp P14618 KPYM_HUMAN  | NTGIICTIGPASR       | 680.356093   | 2                |
| sp P14618 KPYM_HUMAN  | NTGIICTIGPASR       | 685.360228   | 2                |
| sp P14618 KPYM_HUMAN  | APIIAVTR            | 420.76872    | 2                |
| sp P14618 KPYM_HUMAN  | APIIAVTR            | 425.772854   | 2                |
| sp P07355 ANXA2_HUMAN | GVDEVTIVNILTNR      | 771.927937   | 2                |
| sp P07355 ANXA2_HUMAN | GVDEVTIVNILTNR      | 776.932071   | 2                |
| sp P07355 ANXA2_HUMAN | QDIAFAYQR           | 556.28018    | 2                |
| sp P07355 ANXA2_HUMAN | QDIAFAYQR           | 561.284315   | 2                |
| sp P15941 MUC1_HUMAN  | QGGFLGLSNIK         | 567.319305   | 2                |
| sp P15941 MUC1_HUMAN  | QGGFLGLSNIK         | 571.326405   | 2                |
| sp P15941 MUC1_HUMAN  | EGTINVHDTVETQFNQYK  | 674.656954   | 3                |
| sp P15941 MUC1_HUMAN  | EGTINVHDTVETQFNQYK  | 677.328354   | 3                |
| sp P55060 XPO2_HUMAN  | ANIVHMLMLSSPEQIQK   | 603.329344   | 3                |
| sp P55060 XPO2_HUMAN  | ANIVHMLMLSSPEQIQK   | 606.000744   | 3                |
| sp P55060 XPO2_HUMAN  | LLQTDDEEEAGLLELLK   | 965.006778   | 2                |
| sp P55060 XPO2_HUMAN  | LLQTDDEEEAGLLELLK   | 969.013878   | 2                |
| sp P50454 SERPH_HUMAN | GVVEVTHDLQK         | 408.890943   | 3                |
| sp P50454 SERPH_HUMAN | GVVEVTHDLQK         | 411.562343   | 3                |
| sp P50454 SERPH_HUMAN | DTQSGSLLFIGR        | 647.343509   | 2                |
| sp P50454 SERPH_HUMAN | DTQSGSLLFIGR        | 652.347643   | 2                |
| sp P16035 TIMP2_HUMAN | EVDSGNDIYGNIPIK     | 760.865002   | 2                |
| sp P16035 TIMP2_HUMAN | EVDSGNDIYGNIPIK     | 764.872102   | 2                |
| sp P09382 LEG1_HUMAN  | SFVLNLGK            | 439.260728   | 2                |
| sp P09382 LEG1_HUMAN  | SFVLNLGK            | 443.267827   | 2                |
| sp P09382 LEG1_HUMAN  | LPDGYEFK            | 484.739825   | 2                |
| sp P09382 LEG1_HUMAN  | LPDGYEFK            | 488.746925   | 2                |
| sp Q13938 CAYP1_HUMAN | EAVIAAAFAK          | 495.784567   | 2                |
| sp Q13938 CAYP1_HUMAN | EAVIAAAFAK          | 499.791666   | 2                |
| sp Q13938 CAYP1_HUMAN | SGDGVTVDDLR         | 616.809499   | 2                |
| sp Q13938 CAYP1_HUMAN | SGDGVTVDDLR         | 621.813633   | 2                |
| sp P42574 CASP3_HUMAN | SGTDVDAANLR         | 559.775459   | 2                |
| sp P42574 CASP3_HUMAN | SGTDVDAANLR         | 564.779593   | 2                |
| sp P16949 STMN1_HUMAN | SHEAEVLK            | 456.742899   | 2                |
| sp P16949 STMN1_HUMAN | SHEAEVLK            | 460.749999   | 2                |
| sp P16949 STMN1_HUMAN | AIEENNNFSK          | 583.277834   | 2                |
| sp P16949 STMN1_HUMAN | AIEENNNFSK          | 587.284934   | 2                |
| sp P14780 MMP9_HUMAN  | SLGPALLLLQK         | 576.871174   | 2                |
| sp P14780 MMP9_HUMAN  | SLGPALLLLQK         | 580.878273   | 2                |
| sp P14780 MMP9_HUMAN  | AFALWSAVTPLTFTFR    | 840.95904    | 2                |
| sp P14780 MMP9_HUMAN  | AFALWSAVTPLTFTFR    | 845.963174   | 2                |
| sp P08670 VIME_HUMAN  | ILLAELEQLK          | 585.360639   | 2                |
| sp P08670 VIME_HUMAN  | ILLAELEQLK          | 589.367738   | 2                |
| sp P08670 VIME_HUMAN  | ISLPLPNFSSLNLR      | 785.951215   | 2                |
| sp P08670 VIME_HUMAN  | ISLPLPNFSSLNLR      | 790.955349   | 2                |
| sp P16070 CD44_HUMAN  | TEAADLCK            | 454.213117   | 2                |

|                       |                          |            |   |
|-----------------------|--------------------------|------------|---|
| sp P16070 CD44_HUMAN  | TEAADLCK                 | 458.220217 | 2 |
| sp P15328 FOLR1_HUMAN | TELLNVCMNAK              | 646.820498 | 2 |
| sp P15328 FOLR1_HUMAN | TELLNVCMNAK              | 650.827597 | 2 |
| sp P15328 FOLR1_HUMAN | FNWNHCGEMAPACK           | 574.570893 | 3 |
| sp P15328 FOLR1_HUMAN | FNWNHCGEMAPACK           | 577.242293 | 3 |
| sp O43852 CALU_HUMAN  | TFDQLTPEESK              | 647.811707 | 2 |
| sp O43852 CALU_HUMAN  | TFDQLTPEESK              | 651.818806 | 2 |
| sp P09603 CSF1_HUMAN  | AFLLVQDIMEDTMR           | 841.418033 | 2 |
| sp P09603 CSF1_HUMAN  | AFLLVQDIMEDTMR           | 846.422168 | 2 |
| sp P09603 CSF1_HUMAN  | TFYETPLQLLEK             | 741.39795  | 2 |
| sp P09603 CSF1_HUMAN  | TFYETPLQLLEK             | 745.405049 | 2 |
| sp Q06830 PRDX1_HUMAN | ADEGISFR                 | 447.719424 | 2 |
| sp Q06830 PRDX1_HUMAN | ADEGISFR                 | 452.723558 | 2 |
| sp Q06830 PRDX1_HUMAN | LVQAFQFTDK               | 598.819138 | 2 |
| sp Q06830 PRDX1_HUMAN | LVQAFQFTDK               | 602.826238 | 2 |
| sp O75556 SG2A1_HUMAN | TINSDISIPEYK             | 690.356282 | 2 |
| sp O75556 SG2A1_HUMAN | TINSDISIPEYK             | 694.363381 | 2 |
| sp O75556 SG2A1_HUMAN | ELLQEFIDSDAAAEAMGK       | 646.643546 | 3 |
| sp O75556 SG2A1_HUMAN | ELLQEFIDSDAAAEAMGK       | 649.314945 | 3 |
| sp P22626 ROA2_HUMAN  | TLETVPLER                | 529.298038 | 2 |
| sp P22626 ROA2_HUMAN  | TLETVPLER                | 534.302173 | 2 |
| sp P22626 ROA2_HUMAN  | GGNFGFGDSR               | 507.225405 | 2 |
| sp P22626 ROA2_HUMAN  | GGNFGFGDSR               | 512.229539 | 2 |
| sp P09211 GSTP1_HUMAN | ASCLYGQLPK               | 568.792066 | 2 |
| sp P09211 GSTP1_HUMAN | ASCLYGQLPK               | 572.799166 | 2 |
| sp P09211 GSTP1_HUMAN | TLGLYGK                  | 376.221071 | 2 |
| sp P09211 GSTP1_HUMAN | TLGLYGK                  | 380.228171 | 2 |
| sp Q01995 TAGL_HUMAN  | TLMALGSLAVTK             | 602.852124 | 2 |
| sp Q01995 TAGL_HUMAN  | TLMALGSLAVTK             | 606.859223 | 2 |
| sp Q01995 TAGL_HUMAN  | EFTESQLQEGK              | 648.309331 | 2 |
| sp Q01995 TAGL_HUMAN  | EFTESQLQEGK              | 652.316431 | 2 |
| sp P00441 SODC_HUMAN  | AVCVLK                   | 345.204367 | 2 |
| sp P00441 SODC_HUMAN  | AVCVLK                   | 349.211466 | 2 |
| sp P00441 SODC_HUMAN  | TLVVHEK                  | 413.245078 | 2 |
| sp P00441 SODC_HUMAN  | TLVVHEK                  | 417.252177 | 2 |
| sp P04083 ANXA1_HUMAN | GGPGSAVSPYPTFNPSSDVAALHK | 786.057118 | 3 |
| sp P04083 ANXA1_HUMAN | GGPGSAVSPYPTFNPSSDVAALHK | 788.728517 | 3 |
| sp P04083 ANXA1_HUMAN | DITSDTSGDFR              | 607.270206 | 2 |
| sp P04083 ANXA1_HUMAN | DITSDTSGDFR              | 612.274341 | 2 |
| sp Q01469 FABP5_HUMAN | ELGVGIALR                | 464.284734 | 2 |
| sp Q01469 FABP5_HUMAN | ELGVGIALR                | 469.288869 | 2 |
| sp Q01469 FABP5_HUMAN | LVVECMNNTCTR             | 847.904767 | 2 |
| sp Q01469 FABP5_HUMAN | LVVECMNNTCTR             | 852.908902 | 2 |
| sp P08253 MMP2_HUMAN  | IDAVYEAPQEEK             | 696.338089 | 2 |
| sp P08253 MMP2_HUMAN  | IDAVYEAPQEEK             | 700.345188 | 2 |
| sp P08253 MMP2_HUMAN  | VDAAFNWSK                | 519.256174 | 2 |
| sp P08253 MMP2_HUMAN  | VDAAFNWSK                | 523.263273 | 2 |
| sp P07237 PDIA1_HUMAN | ALAPEYAK                 | 431.737085 | 2 |
| sp P07237 PDIA1_HUMAN | ALAPEYAK                 | 435.744185 | 2 |
| sp P07237 PDIA1_HUMAN | ILEFFGLK                 | 483.786578 | 2 |
| sp P07237 PDIA1_HUMAN | ILEFFGLK                 | 487.793678 | 2 |
| sp P12830 CADH1_HUMAN | NLVQIK                   | 357.729063 | 2 |
| sp P12830 CADH1_HUMAN | NLVQIK                   | 361.736163 | 2 |
| sp P12830 CADH1_HUMAN | VFYSITGQGADTPPVGVFIIR    | 789.417875 | 3 |
| sp P12830 CADH1_HUMAN | VFYSITGQGADTPPVGVFIIR    | 792.753965 | 3 |
| sp P61604 CH10_HUMAN  | FLPLFDR                  | 454.255445 | 2 |
| sp P61604 CH10_HUMAN  | FLPLFDR                  | 459.25958  | 2 |
| sp P61604 CH10_HUMAN  | VLLPEYGGTK               | 538.802957 | 2 |
| sp P61604 CH10_HUMAN  | VLLPEYGGTK               | 542.810056 | 2 |
| sp P30086 PEBP1_HUMAN | VLTPQVK                  | 443.273835 | 2 |
| sp P30086 PEBP1_HUMAN | VLTPQVK                  | 447.280935 | 2 |
| sp P30086 PEBP1_HUMAN | LYEQLSGK                 | 469.2531   | 2 |
| sp P30086 PEBP1_HUMAN | LYEQLSGK                 | 473.260199 | 2 |
| sp P09466 PAEP_HUMAN  | VLVEDDEIMQGFIR           | 832.42163  | 2 |
| sp P09466 PAEP_HUMAN  | VLVEDDEIMQGFIR           | 837.425764 | 2 |
| sp P80188 NGAL_HUMAN  | VPLQQNFQDNQFQGGK         | 597.632192 | 3 |

|                       |                       |            |   |
|-----------------------|-----------------------|------------|---|
| sp P80188 NGAL_HUMAN  | VPLQQNFQDNQFQ GK      | 600.303591 | 3 |
| sp P80188 NGAL_HUMAN  | ELTSELK               | 410.22655  | 2 |
| sp P80188 NGAL_HUMAN  | ELTSELK               | 414.23365  | 2 |
| sp Q14508 WFDC2_HUMAN | EGSCPQVNINFPQLGLCR    | 697.003303 | 3 |
| sp Q14508 WFDC2_HUMAN | EGSCPQVNINFPQLGLCR    | 700.339392 | 3 |
| sp Q14508 WFDC2_HUMAN | VSCVTPNF              | 462.218203 | 2 |
| sp Q14508 WFDC2_HUMAN | VSCVTPNF              | 467.231817 | 2 |
| sp P62937 PPIA_HUMAN  | VSFELFADK             | 528.274032 | 2 |
| sp P62937 PPIA_HUMAN  | VSFELFADK             | 532.281132 | 2 |
| sp P62937 PPIA_HUMAN  | FEDENFILK             | 577.790046 | 2 |
| sp P62937 PPIA_HUMAN  | FEDENFILK             | 581.797146 | 2 |
| sp P04792 HSPB1_HUMAN | LFDQAFGLPR            | 582.314023 | 2 |
| sp P04792 HSPB1_HUMAN | LFDQAFGLPR            | 587.318157 | 2 |
| sp P04792 HSPB1_HUMAN | LATQSN EITIPVTFESR    | 953.499455 | 2 |
| sp P04792 HSPB1_HUMAN | LATQSN EITIPVTFESR    | 958.503589 | 2 |
| sp P07339 CATD_HUMAN  | VSTLPAILTK            | 521.828974 | 2 |
| sp P07339 CATD_HUMAN  | VSTLPAILTK            | 525.836074 | 2 |
| sp P07339 CATD_HUMAN  | VGFAEAAR              | 410.719227 | 2 |
| sp P07339 CATD_HUMAN  | VGFAEAAR              | 415.723361 | 2 |
| sp P11166 GTR1_HUMAN  | TFDEIASGFR            | 571.77747  | 2 |
| sp P11166 GTR1_HUMAN  | TFDEIASGFR            | 576.781605 | 2 |
| sp P00338 LDHA_HUMAN  | LVITAGAR              | 457.295102 | 2 |
| sp P00338 LDHA_HUMAN  | LVITAGAR              | 462.299236 | 2 |
| sp P00338 LDHA_HUMAN  | VTLTSEEEAR            | 567.785492 | 2 |
| sp P00338 LDHA_HUMAN  | VTLTSEEEAR            | 572.789627 | 2 |
| sp P60174 TPIS_HUMAN  | VVLAYEPVWAIGTGK       | 801.948141 | 2 |
| sp P60174 TPIS_HUMAN  | VVLAYEPVWAIGTGK       | 805.95524  | 2 |
| sp P60174 TPIS_HUMAN  | SNVSDAVAQSTR          | 617.804748 | 2 |
| sp P60174 TPIS_HUMAN  | SNVSDAVAQSTR          | 622.808882 | 2 |
| sp P05164 PERM_HUMAN  | IANVFTNAFR            | 576.811647 | 2 |
| sp P05164 PERM_HUMAN  | IANVFTNAFR            | 581.815782 | 2 |
| sp P05164 PERM_HUMAN  | VVLEGGIDPILR          | 640.88227  | 2 |
| sp P05164 PERM_HUMAN  | VVLEGGIDPILR          | 645.886404 | 2 |
| sp P14174 MIF_HUMAN   | LLCGLLAER             | 522.797151 | 2 |
| sp P14174 MIF_HUMAN   | LLCGLLAER             | 527.801286 | 2 |
| sp P14174 MIF_HUMAN   | VYINYDDMNAANVGWNNSTFA | 809.695191 | 3 |
| sp P14174 MIF_HUMAN   | VYINYDDMNAANVGWNNSTFA | 813.037601 | 3 |
| sp P01833 PIGR_HUMAN  | GGCITLISSEGYVSSK      | 829.40872  | 2 |
| sp P01833 PIGR_HUMAN  | GGCITLISSEGYVSSK      | 833.415819 | 2 |
| sp P01833 PIGR_HUMAN  | VYTVDLGR              | 461.753267 | 2 |
| sp P01833 PIGR_HUMAN  | VYTVDLGR              | 466.757401 | 2 |
| sp P05787 K2C8_HUMAN  | WSLLQQQK              | 515.787641 | 2 |
| sp P05787 K2C8_HUMAN  | WSLLQQQK              | 519.79474  | 2 |
| sp P05787 K2C8_HUMAN  | LSELEAALQR            | 565.31422  | 2 |
| sp P05787 K2C8_HUMAN  | LSELEAALQR            | 570.318354 | 2 |
| sp O43278 SPIT1_HUMAN | WYYDPTEQICK           | 751.834659 | 2 |
| sp O43278 SPIT1_HUMAN | WYYDPTEQICK           | 755.841759 | 2 |
| sp O43278 SPIT1_HUMAN | SFVYGGCLGNK           | 601.287148 | 2 |
| sp O43278 SPIT1_HUMAN | SFVYGGCLGNK           | 605.294247 | 2 |
| sp P06733 ENOA_HUMAN  | TIAPALVSK             | 450.28166  | 2 |
| sp P06733 ENOA_HUMAN  | TIAPALVSK             | 454.28876  | 2 |
| sp P06733 ENOA_HUMAN  | YISPDQLADLYK          | 713.366649 | 2 |
| sp P06733 ENOA_HUMAN  | YISPDQLADLYK          | 717.373749 | 2 |
| sp Q16658 FSCN1_HUMAN | FLIVAHDDGR            | 381.536612 | 3 |
| sp Q16658 FSCN1_HUMAN | FLIVAHDDGR            | 384.872701 | 3 |
| sp Q16658 FSCN1_HUMAN | YLAPSGPSGTLK          | 595.82442  | 2 |
| sp Q16658 FSCN1_HUMAN | YLAPSGPSGTLK          | 599.83152  | 2 |
| sp P43490 NAMPT_HUMAN | YDGHLP I EIK          | 395.548517 | 3 |
| sp P43490 NAMPT_HUMAN | YDGHLP I EIK          | 398.219917 | 3 |
| sp P43490 NAMPT_HUMAN | YLLETSGNLDGLE YK      | 857.930342 | 2 |
| sp P43490 NAMPT_HUMAN | YLLETSGNLDGLE YK      | 861.937442 | 2 |
| sp P40121 CAPG_HUMAN  | YQEGGVESAFHK          | 451.214086 | 3 |
| sp P40121 CAPG_HUMAN  | YQEGGVESAFHK          | 453.885486 | 3 |
| sp P40121 CAPG_HUMAN  | EGNPEEDLTADK          | 659.293878 | 2 |
| sp P40121 CAPG_HUMAN  | EGNPEEDLTADK          | 663.300978 | 2 |
