# Supplementary figures and images for: Cervical Fluids Are a Source of Protein Biomarkers for Early, Non-Invasive Endometrial Cancer Diagnosis
Source: MDPI journal article supplement (doi:10.3390/cancers15030911), 2023-01-31

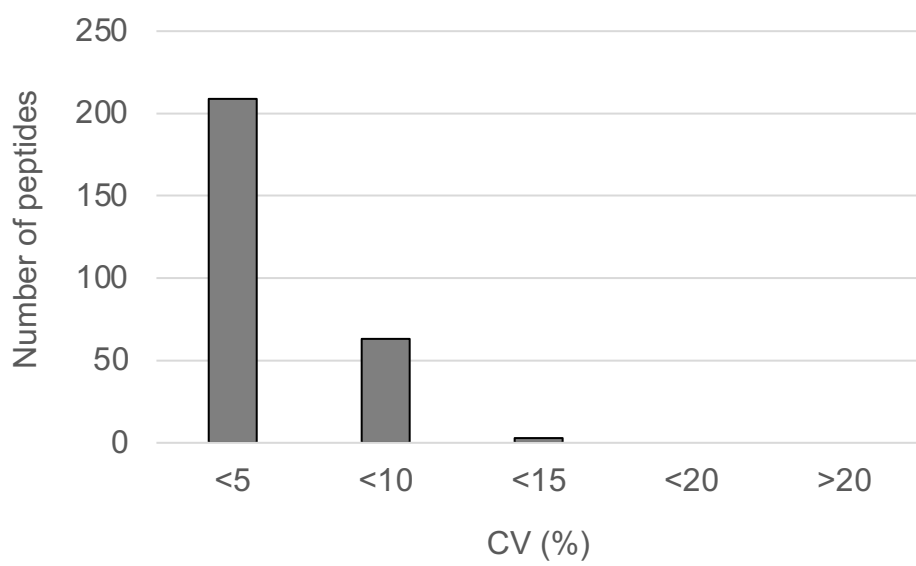

Supplement: s1 [file s1]

## A M1 Cervical fluids

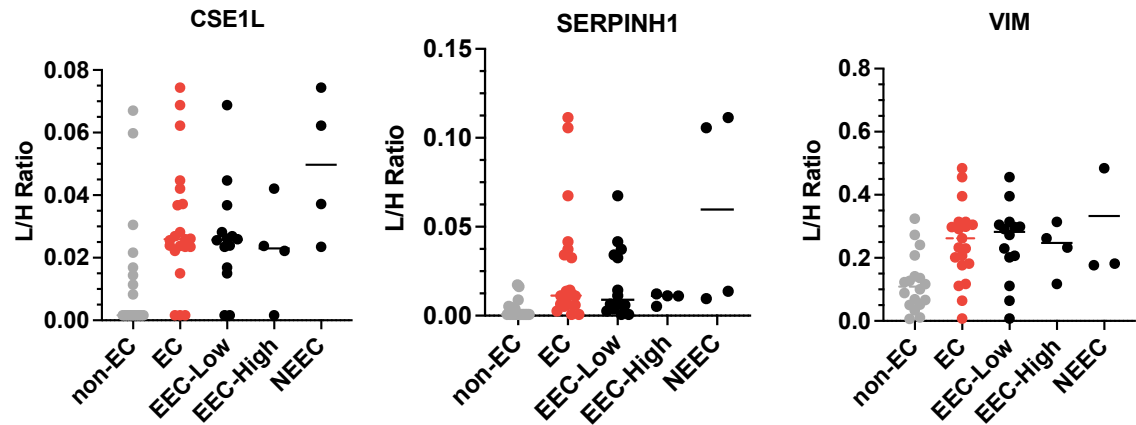

## B M3 Cervical fluids

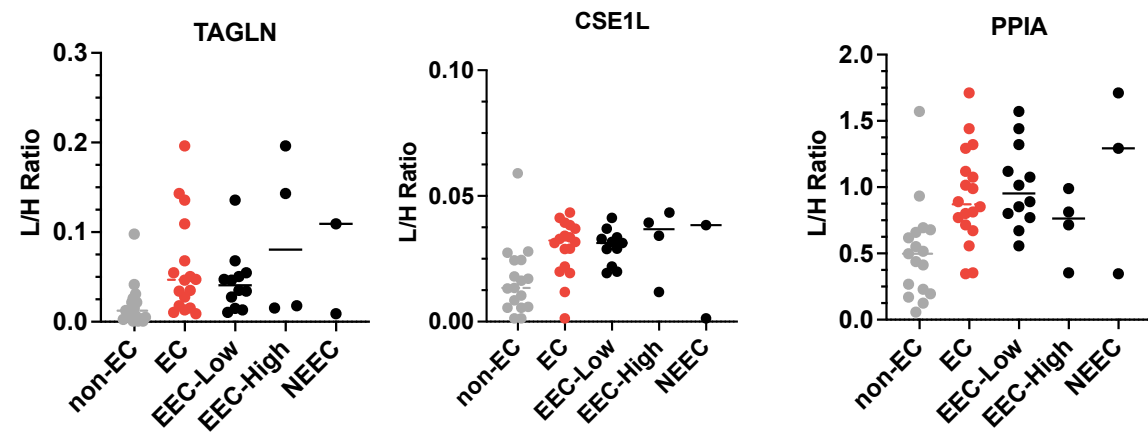

Supplement: s1 [file s1]
